# Supplementary material
Source: Springer Nature journal article supplement (https://www.springermedizin.de/resource/supplementary/12936_2011_1893_MOESM2_ESM.pdf/9541972)

# Plasma levels (MQ, MMQ, MQ+,MQ-) during chemoprophylaxis (250mg/wk)

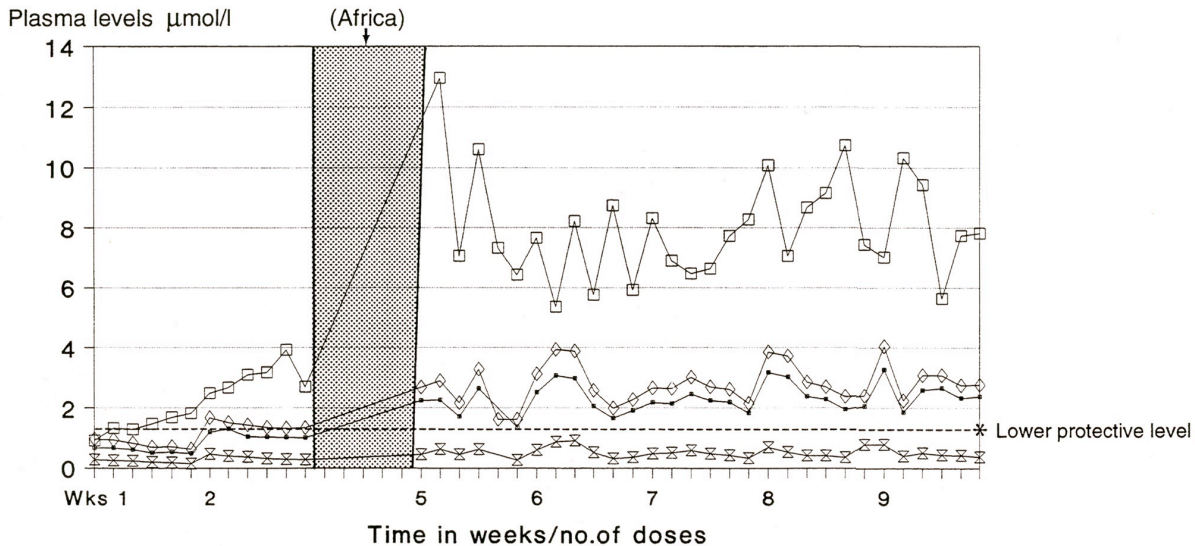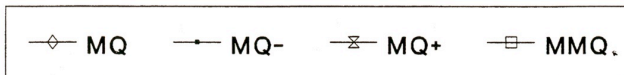

Supplement: MOESM2 [file 9541972]
